# Supplementary material for: p38 MAPK Inhibition Mitigates Hypoxia-Induced AR Signaling in Castration-Resistant Prostate Cancer
Source: MDPI journal article supplement (doi:10.3390/cancers13040831), 2021-02-17

Figure 1a

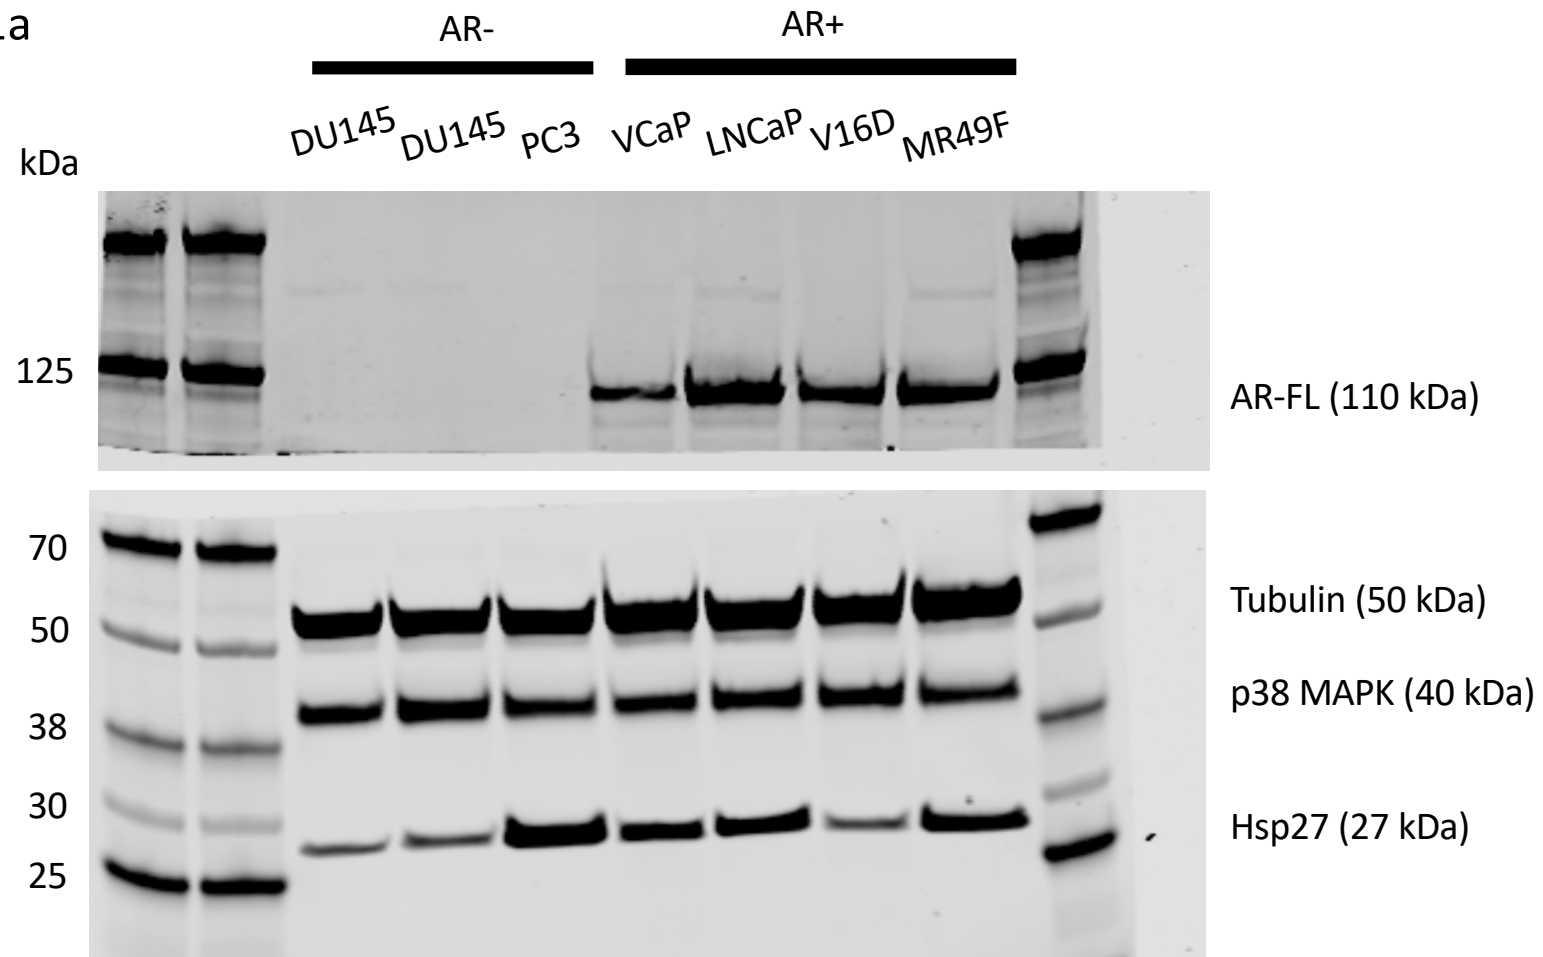

Cut blot from the same gel

Figure 1c

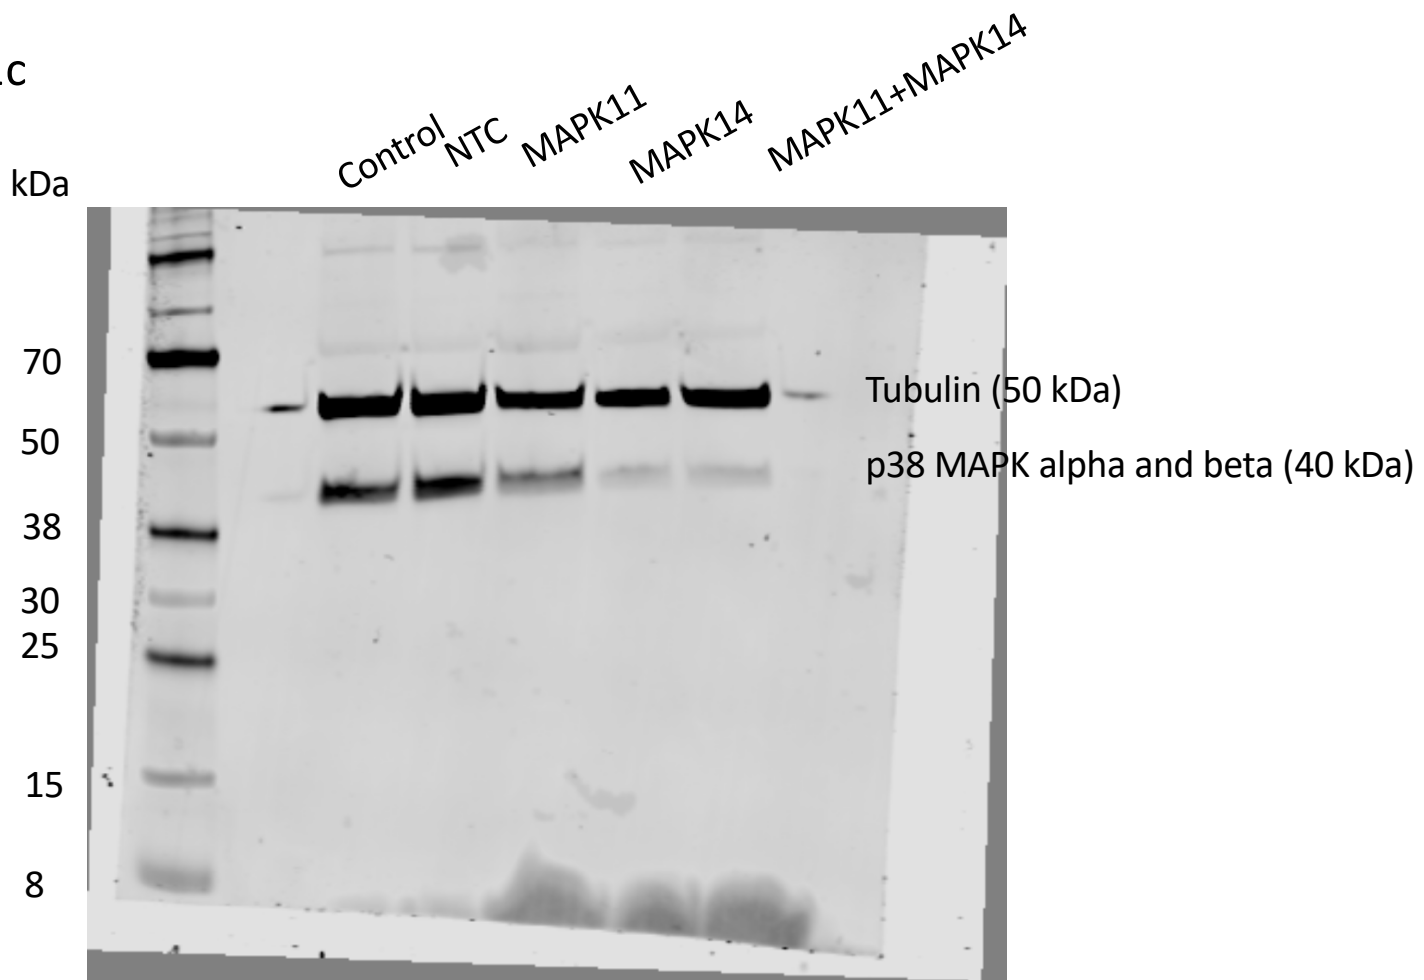

Figure 2a

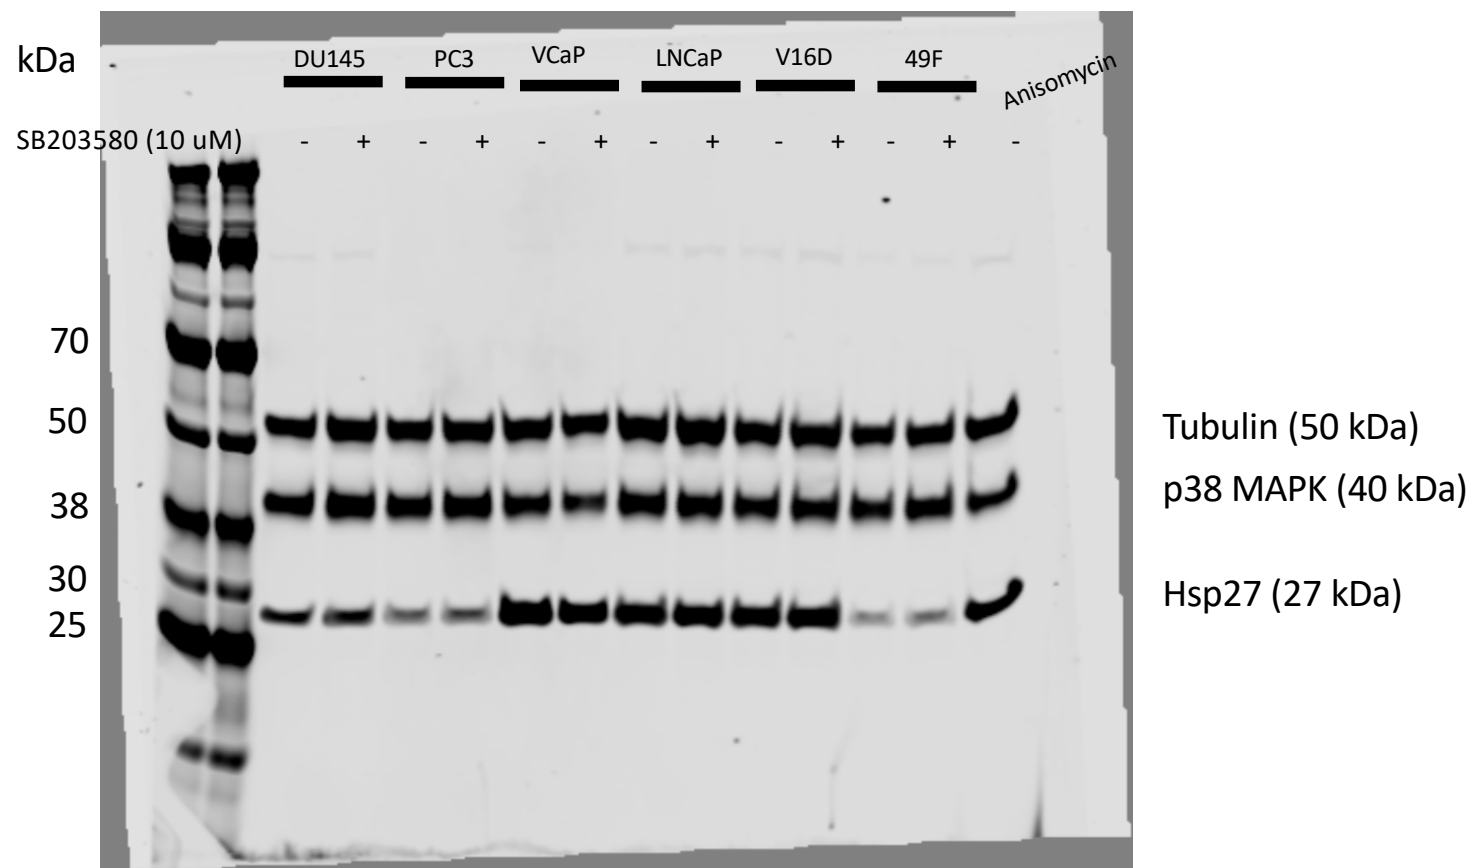

Figure 2a (continued)

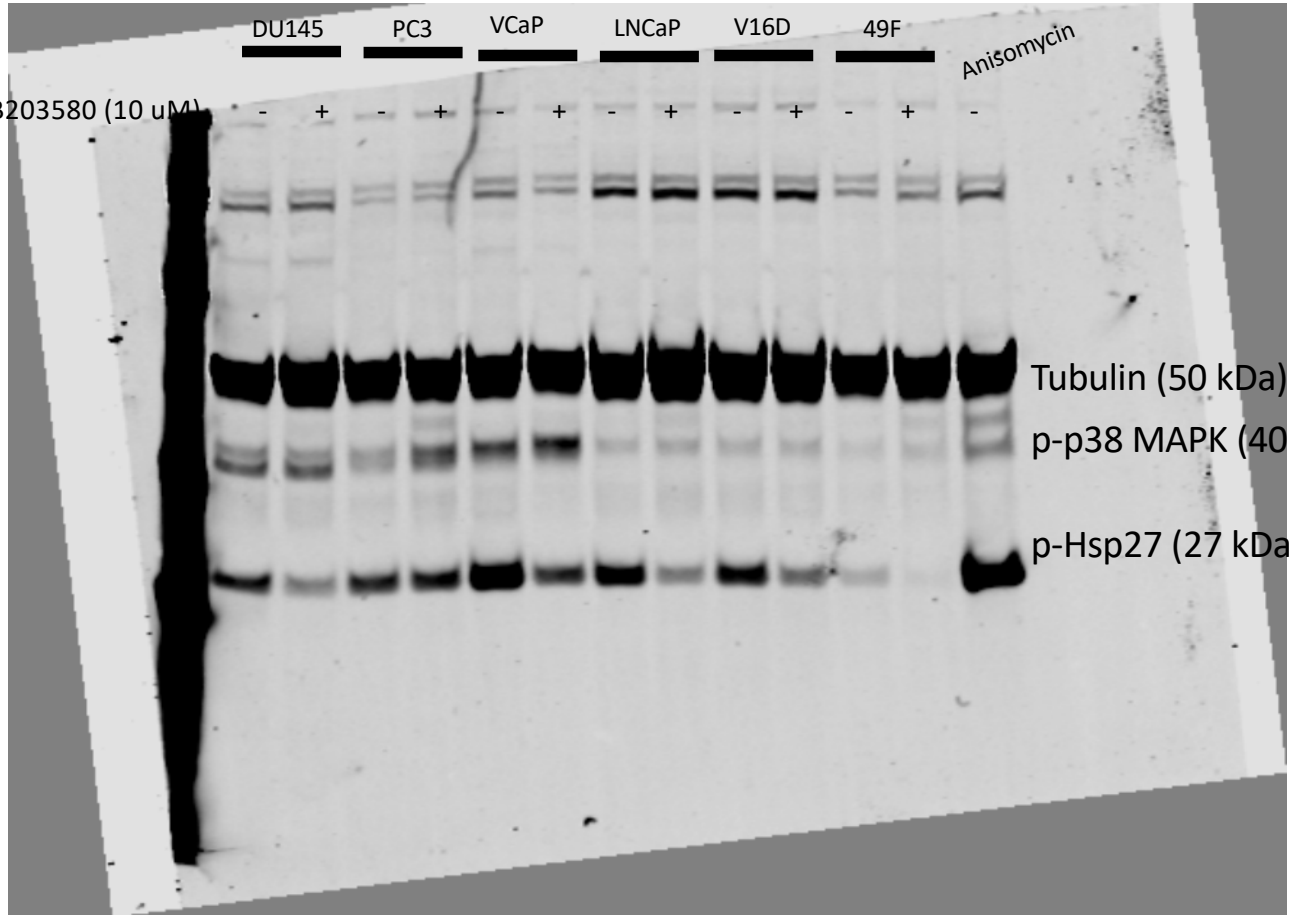

High exposure to visualize p-p38 and p-Hsp27

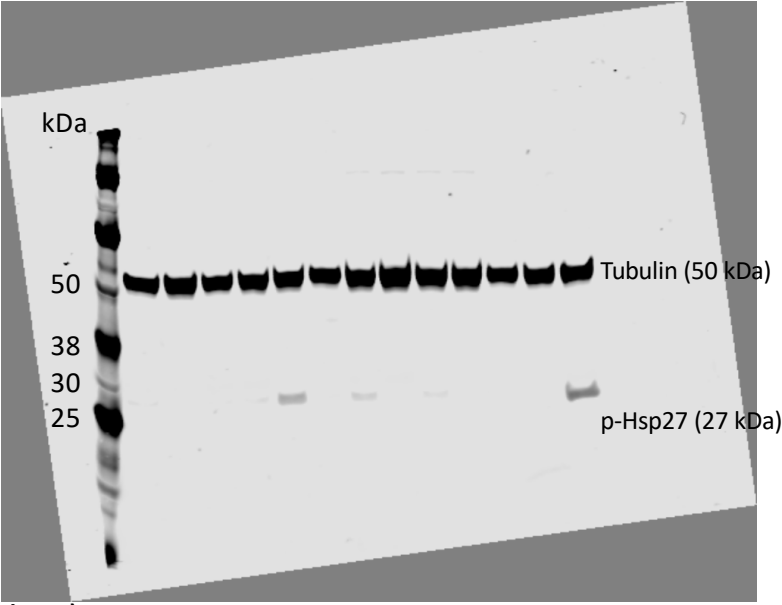

Same blot, lower exposure

Figure 3a

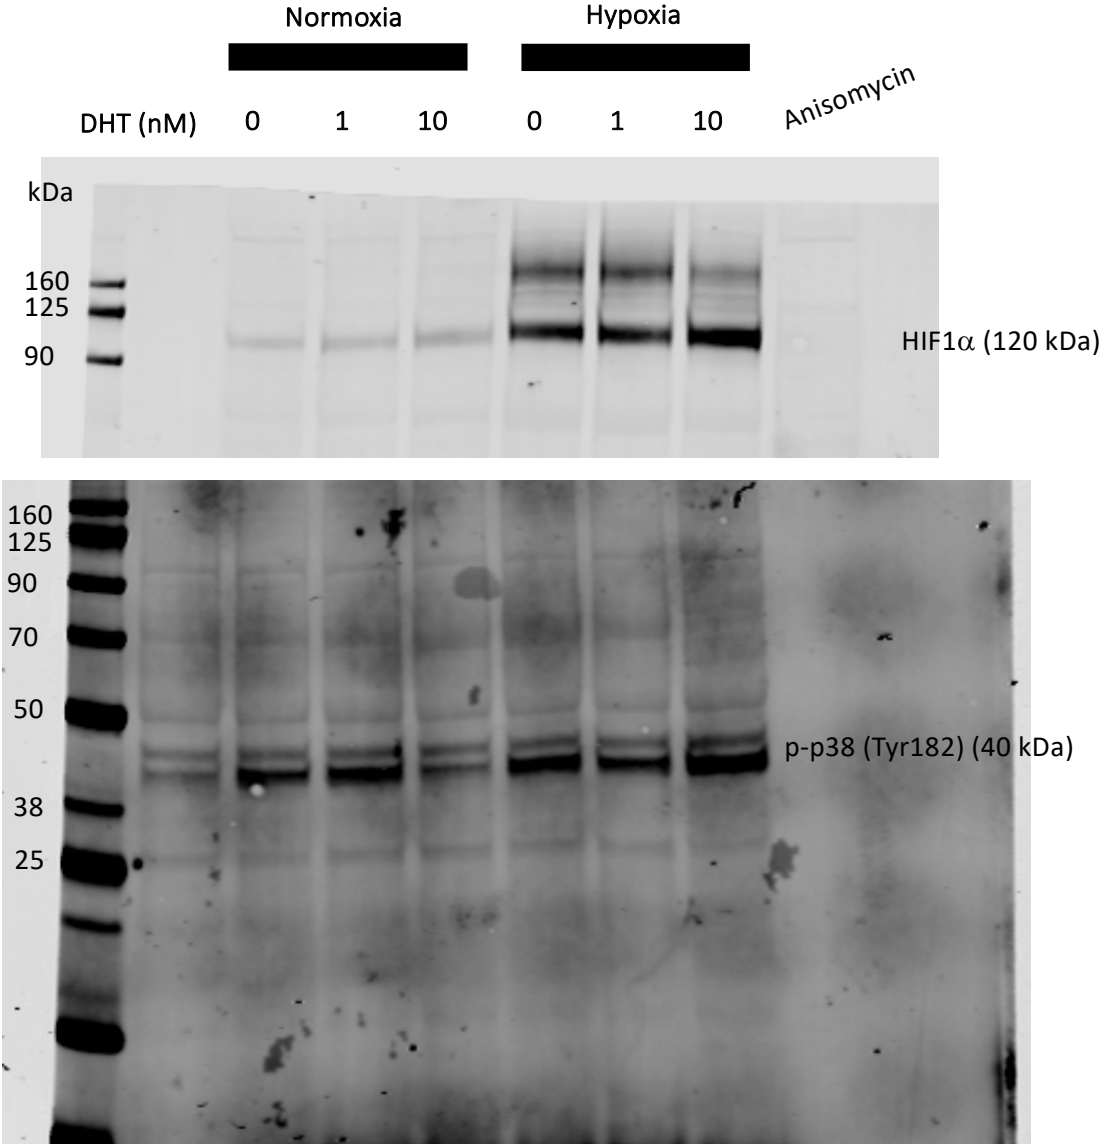

Figure 3a

Normoxia      Hypoxia

DHT (nM)   0   1   10   0   1   10   Anisomycin

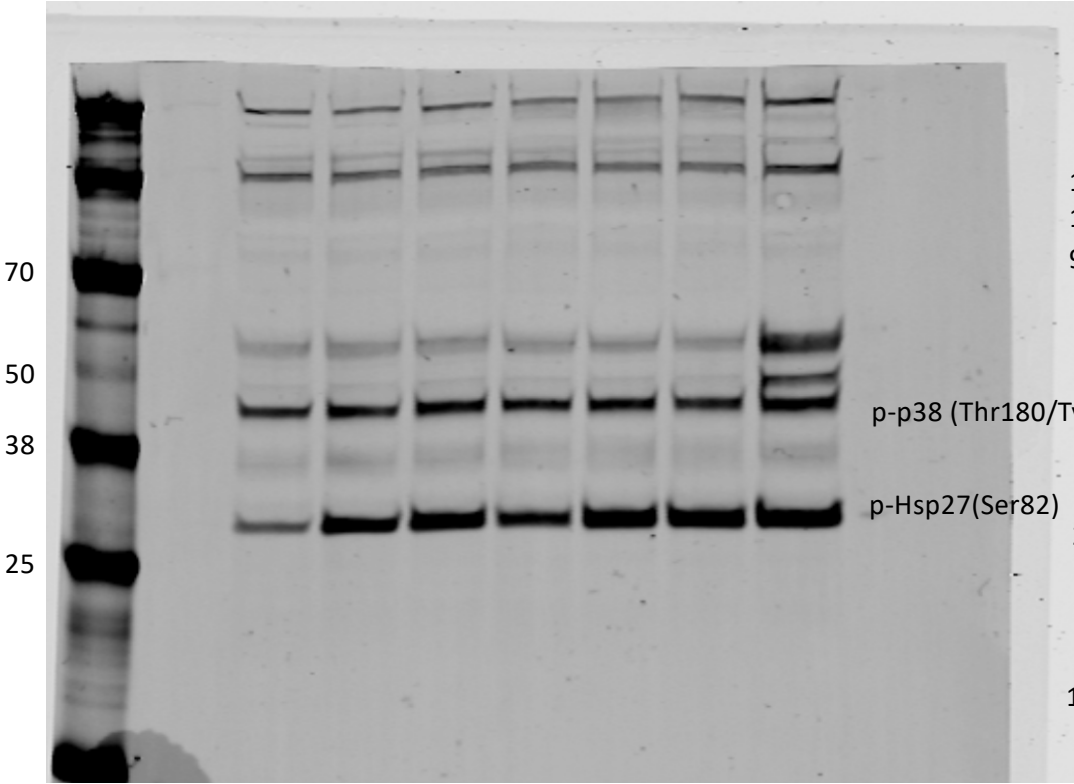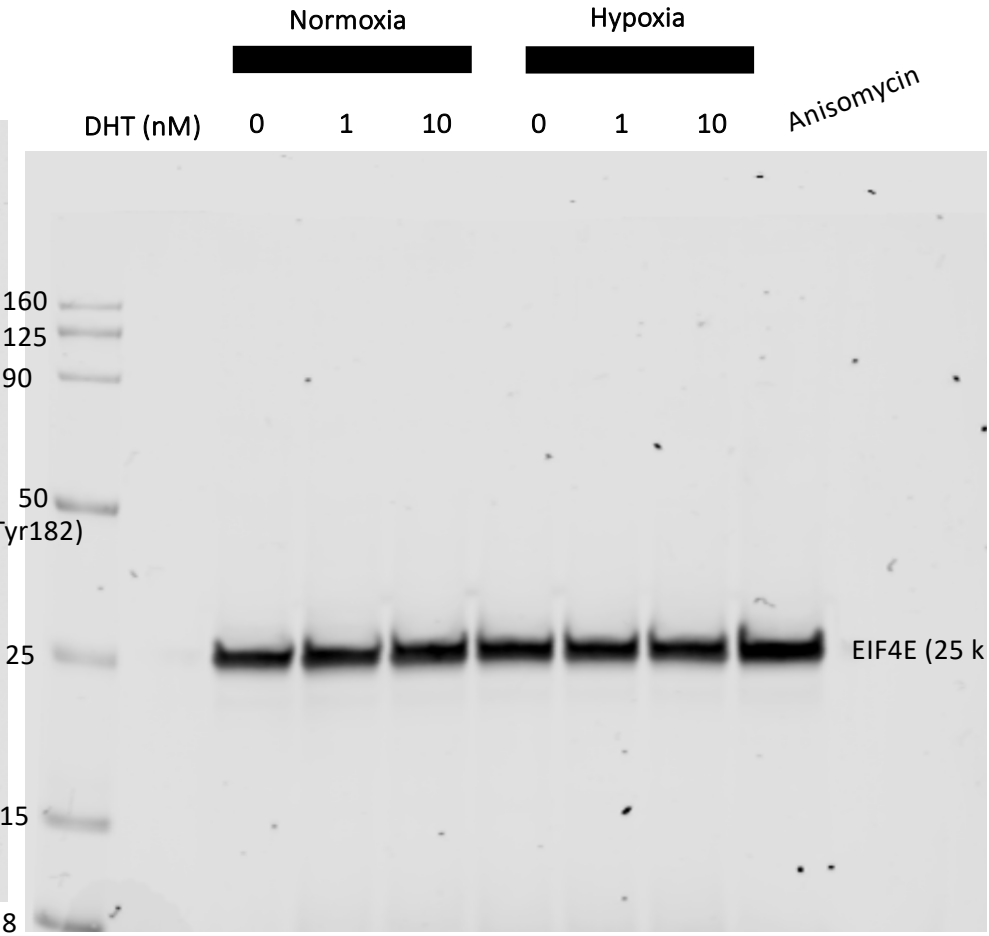

Supplement: s1 [file s1]
