# Supplementary material for: p38 MAPK Inhibition Mitigates Hypoxia-Induced AR Signaling in Castration-Resistant Prostate Cancer
Source: MDPI journal article supplement (doi:10.3390/cancers13040831), 2021-02-17
Supplement: s1 [file s1]

## Supplementary Figure 1

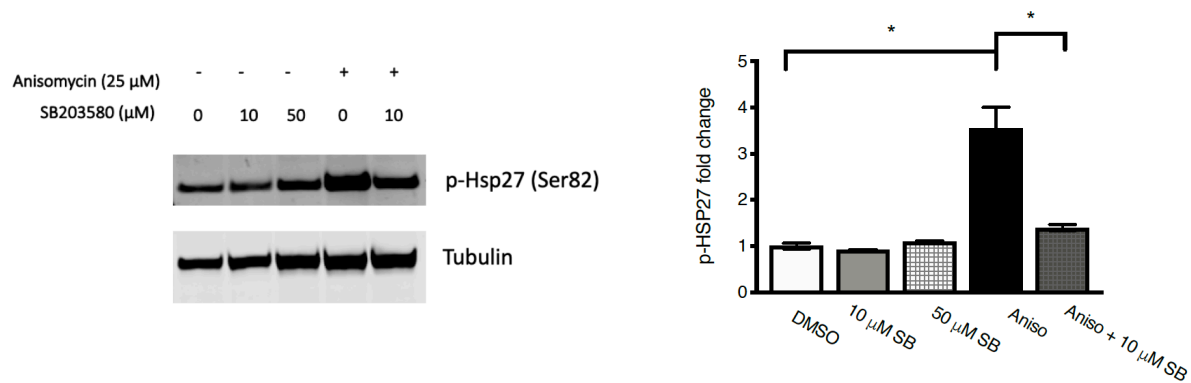

### Supplementary Figure 1.

PC3 cells were treated with SB203580 (10  $\mu$ M or 50  $\mu$ M), 25  $\mu$ M anisomycin, or the combination for one hour and subjected to western blotting (left). Densitometry analysis of protein bands was performed on Image Studio to calculate fold change of p-Hsp27 (Ser82) relative to tubulin (right). Bars represent the mean of three independent experiments  $\pm$  S.E.M (\*:  $p \leq 0.05$ ).

Supplementary Figure 2

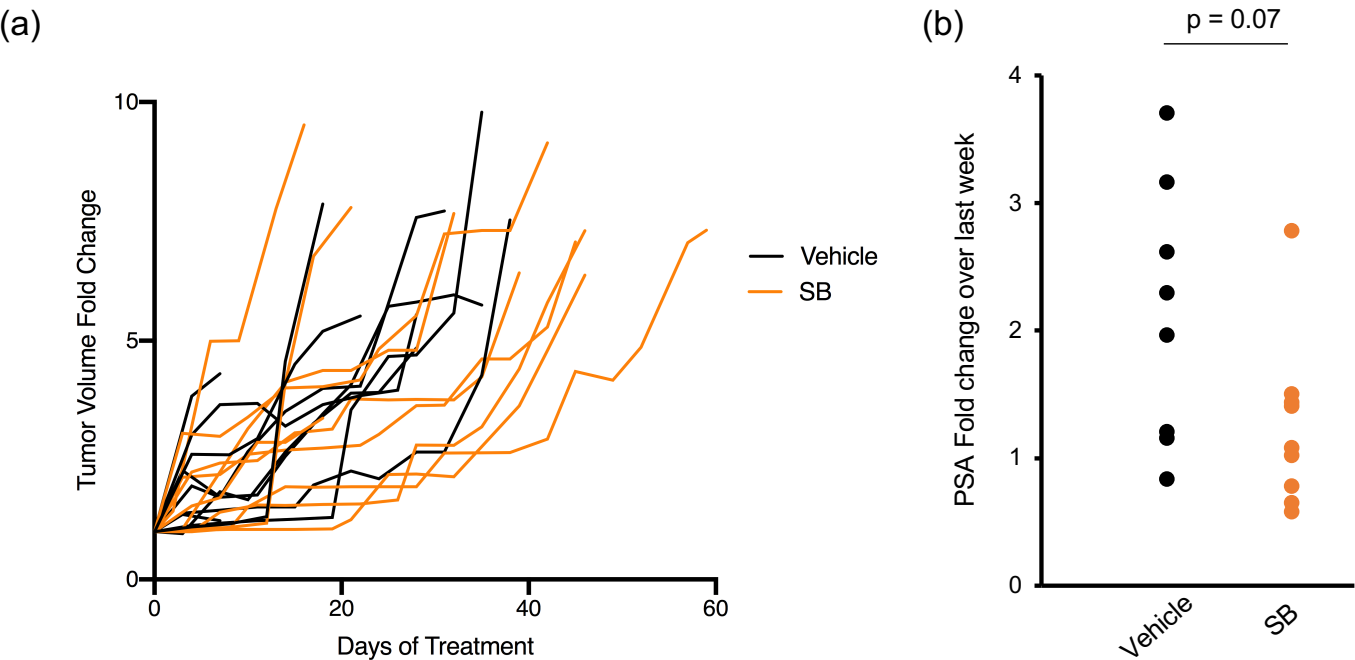

**Supplementary Figure 2.**

(a) Subcutaneous V16D xenografts were established and treatment with vehicle or SB203580 (10 mg/kg) started when tumors reached 200 mm<sup>3</sup> (Day 0), in a 5 days on and 2 days off schedule until endpoint. Tumor growth curves from individual mice are shown normalized to their starting volume. (b) PSA was measured by ELISA in blood samples from tumor-bearing mice. Fold change in PSA for each mouse in their last week of life is plotted for each treatment group. A Mann-Whitney test was used to obtain the displayed p-value.

**Supplementary Table 1**

|                                                                  | Vehicle (n=10) | SB203580 (n=10) |
|------------------------------------------------------------------|----------------|-----------------|
| Average tumor volume at Day 0 [mm <sup>3</sup> ]                 | 216.0          | 202.9           |
| Standard Deviation of tumor volumes at Day 0 [mm <sup>3</sup> ]  | 39.3           | 26.6            |
| Median tumor volume at Day 0 [mm <sup>3</sup> ]                  | 200.6          | 191.3           |
| Interquartile range of tumor volumes at Day 0 [mm <sup>3</sup> ] | 38.7           | 43.0            |
| Median number of days to endpoint                                | 28.0           | 40.5            |
| Interquartile range of days to endpoint                          | 12.0           | 21.5            |

**Supplementary Table 1.**

Tumor volume and endpoint characteristics for treatment groups.
